# Supplementary material
Source: PubMed Central journal article supplement (PMC6785231)
Supplement: ehp4386.s001.acco.pdf [file ehp4386.s001.acco.pdf]

**Note to readers with disabilities:** *EHP* strives to ensure that all journal content is accessible to all readers. However, some figures and Supplemental Material published in *EHP* articles may not conform to [508 standards](#) due to the complexity of the information being presented. If you need assistance accessing journal content, please contact [ehp508@niehs.nih.gov](mailto:ehp508@niehs.nih.gov). Our staff will work with you to assess and meet your accessibility needs within 3 working days.

### **Supplemental Material**

#### **Environmental Chemicals and Autism: A Scoping Review of the Human and Animal Research**

Katherine E. Pelch, Ashley L. Bolden, and Carol F. Kwiatkowski

#### **Table of Contents**

**Figure S1.** Interactive Figure for Epidemiological Data.

**Figure S2.** Interactive Figure for Experimental Rodent Data.

**Table S1.** Literature search strategy.

**Table S2.** Reasons for exclusion at full text level.

**Table S3.** Data extracted from included epidemiological studies.

**Table S4.** Data extracted from included experimental rodent studies.

**Table S5.** Data extracted from included reviews.

**Additional File-** Excel Document

# Supplemental Material

## *Environmental Chemicals and Autism: A Scoping Review of the Human and Animal Research*

Katherine E. Pelch, Ashley L. Bolden, Carol F. Kwiatkowski

### Supplemental Figures

Supplemental figures were prepared in Tableau Desktop Professional Edition vs 2018.3.1 (Tableau; Seattle, WA). Supplemental figures contain interactive heat maps in the left hand panel and additional filters and study details in the right hand panel. In the heat map chemical exposures are listed on the y-axis (rows). Exposures are broadly categorized, but can be expanded by clicking on the  that can be found just above the words “Grand Totals”. The x-axis (columns) represent different study details. In the epidemiological studies, the different ways in which autism was cases were defined appear on the x-axis. In the experimental rodent studies, the different animal behaviors appear on the x-axis. These are also broadly grouped and can be expanded by clicking on  that is just to the left of the title row. The heat map can be sorted by clicking on the  or  next to each header.

Panels on the right column offer additional ways to filter the data presented in the figure. For example, epidemiological studies can be filtered by study type and experimental studies can be filtered by the timing of exposure or outcome assessment. A list of included studies can also be found in the right hand column under “Study Details.”

Clicking on a part of the figure filters the data that is shown in the other panels of the figure. For example, if a cell is selected in the heat map, only those studies that comprise the cell are shown in the other panels of the figure. Filters can be reset by clicking in white space or refreshing the page. Hovering over the study name (in Figure S1) or symbols (Figure S2) in the “Study Details” brings up additional information including the title, abstract, and extracted data for each study. Clicking on the study name or symbols links out to PubMed or the publisher where full text can then be retrieved.

### **Figure S1. Interactive Figure for Epidemiological Data**

Figure S1 is available at:

[https://public.tableau.com/profile/the.endocrine.disruption.exchange#!/vizhome/Fig3\\_Environmentalchemicalsandautism-epidemiologicaldata/Interactive](https://public.tableau.com/profile/the.endocrine.disruption.exchange#!/vizhome/Fig3_Environmentalchemicalsandautism-epidemiologicaldata/Interactive)

### **Figure S2. Interactive Figure for Experimental Rodent Data**

Figure S2 is available at:

[https://public.tableau.com/profile/the.endocrine.disruption.exchange#!/vizhome/SupplementalFigure2\\_Environmentalchemicalsandautism-rodentdata/Interactive](https://public.tableau.com/profile/the.endocrine.disruption.exchange#!/vizhome/SupplementalFigure2_Environmentalchemicalsandautism-rodentdata/Interactive)

## **Supplemental Tables**

### **Excel Table S1. Literature search strategy**

The following search logic was run in PubMed on 11/3/2016 and 2/8/2018. There were no restrictions on publication date or publication language.

### **Excel Table S2. Reasons for exclusion at full text level**

The reasons for exclusion of studies during full text review are listed.

### **Excel Table S3. Data extracted from included epidemiological studies**

This table is available in Excel so that users can sort on different data elements extracted from the included epidemiological studies. These data can also be explored in an interactive form in Figure S1

([https://public.tableau.com/profile/the.endocrine.disruption.exchange#!/vizhome/Fig3\\_Environmentalchemicalsandautism-epidemiologicaldata/Interactive](https://public.tableau.com/profile/the.endocrine.disruption.exchange#!/vizhome/Fig3_Environmentalchemicalsandautism-epidemiologicaldata/Interactive)).

### **Excel Table S4. Data extracted from included experimental rodent studies**

This table is available in Excel so that users can sort on different data elements extracted from the included experimental rodent studies. These data can also be explored in an interactive form in Figure S2

([https://public.tableau.com/profile/the.endocrine.disruption.exchange#!/vizhome/SupplementalFigure2\\_Environmentalchemicalsandautism-rodentdata/Interactive](https://public.tableau.com/profile/the.endocrine.disruption.exchange#!/vizhome/SupplementalFigure2_Environmentalchemicalsandautism-rodentdata/Interactive)).

### **Excel Table S5. Data extracted from included reviews**

This table is available in Excel so that users can sort on different data elements extracted from the included reviews.
