# Supplementary material
Source: PubMed Central journal article supplement (PMC6785231)
Supplement: ehp4386.smcontents.508.pdf [file ehp4386.smcontents.508.pdf]

**Note to readers with disabilities:** *EHP* strives to ensure that all journal content is accessible to all readers. However, some figures and Supplemental Material published in *EHP* articles may not conform to [508 standards](#) due to the complexity of the information being presented. If you need assistance accessing journal content, please contact [ehp508@niehs.nih.gov](mailto:ehp508@niehs.nih.gov). Our staff will work with you to assess and meet your accessibility needs within 3 working days.

### **Supplemental Material**

#### **Environmental Chemicals and Autism: A Scoping Review of the Human and Animal Research**

Katherine E. Pelch, Ashley L. Bolden, and Carol F. Kwiatkowski

#### **Table of Contents**

**Figure S1.** Interactive Figure for Epidemiological Data.

**Figure S2.** Interactive Figure for Experimental Rodent Data.

**Table S1.** Literature search strategy.

**Table S2.** Reasons for exclusion at full text level.

**Table S3.** Data extracted from included epidemiological studies.

**Table S4.** Data extracted from included experimental rodent studies.

**Table S5.** Data extracted from included reviews.

**Additional File-** Excel Document
